# Supplementary material for: Applying Different Vinification Techniques in Teran Red Wine Production: Impact on Bioactive Compounds and Sensory Attributes
Source: MDPI journal article supplement (doi:10.3390/foods12203838), 2023-10-20
Supplement: s1 [file s1]

## Supplementary material and data

Table S1: Validation parameters: retention time, retention time CV, detection wavelengths, calibration curve equation, coefficient of determination

| Phenolic compound                               | Retention time (min) | Retention time (CV %) | DAD $\lambda$ /nm | FLD $\lambda_{ex}$ /nm; FLD $\lambda_{em}$ /nm | Calibration curve  | Coefficient of determination ( $R^2$ ) |
|-------------------------------------------------|----------------------|-----------------------|-------------------|------------------------------------------------|--------------------|----------------------------------------|
| <b>Anthocyanins</b>                             |                      |                       |                   |                                                |                    |                                        |
| Delphinidin-3-O-glucoside                       | 6.0                  | 0.30                  | 518 nm            | -                                              | $y=114.0x-11.76$   | $R^2 = 0.9994$                         |
| Cyanidin-3-O-glucoside                          | 7.8                  | 0.22                  | 518 nm            | -                                              | $y=217.7x-4.617$   | $R^2 = 1.0000$                         |
| Petunidin-3-O-glucoside                         | 9.1                  | 0.20                  | 518 nm            | -                                              | $y=185.6x-12.97$   | $R^2 = 0.9997$                         |
| Peonidin-3-O-glucoside                          | 11.2                 | 0.15                  | 518 nm            | -                                              | $y=177.4x-1.9$     | $R^2 = 1.0000$                         |
| Peonidin-3-O-acetylglucoside                    | 19.1                 | 0.12                  | 518 nm            | -                                              | $y=177.4x-1.9$     | $R^2 = 1.0000$                         |
| Peonidin-3-O-cumarylglucoside                   | 23.9                 | 0.03                  | 518 nm            | -                                              | $y=177.4x-1.9$     | $R^2 = 1.0000$                         |
| Malvidin-3-O-glucoside                          | 12.3                 | 0.07                  | 518 nm            | -                                              | $y=100.7x-39.5$    | $R^2 = 0.9998$                         |
| Malvidin-3-O-acetylglucoside                    | 19.8                 | 0.03                  | 518 nm            | -                                              | $y=100.7x-39.5$    | $R^2 = 0.9998$                         |
| Malvidin-3-O-cumarylglucoside                   | 24.6                 | 0.03                  | 518 nm            | -                                              | $y=100.7x-39.5$    | $R^2 = 0.9998$                         |
| <b>Phenolic acids</b>                           |                      |                       |                   |                                                |                    |                                        |
| Gallic acid                                     | 13.3                 | 0.06                  | 280 nm            | -                                              | $y=83.188x-0.4382$ | $R^2 = 1.0000$                         |
| Protocatechuic acid                             | 18.4                 | 0.04                  | 280 nm            | -                                              | $y=49.951x-0.0523$ | $R^2 = 1.0000$                         |
| <i>p</i> -Hydroxybenzoic acid                   | 23.7                 | 0.10                  | 280 nm            | -                                              | $y=52.536x-0.4104$ | $R^2 = 0.9999$                         |
| Syringic acid                                   | 28.2                 | 0.05                  | 280 nm            | -                                              | $y=93.831x-0.0272$ | $R^2 = 1.0000$                         |
| <i>cis</i> -Caftaric acid                       | 19.9                 | 0.04                  | 330 nm            | -                                              | $y=107.15x-3.9651$ | $R^2 = 1.0000$                         |
| <i>trans</i> -Caftaric acid                     | 21.1                 | 0.06                  | 330 nm            | -                                              | $y=107.15x-3.9651$ | $R^2 = 1.0000$                         |
| Caffeic acid                                    | 27.3                 | 0.07                  | 330 nm            | -                                              | $y=168.83x-1.3451$ | $R^2 = 0.9999$                         |
| <i>p</i> -Coumaric acid                         | 37.7                 | 0.06                  | 330 nm            | -                                              | $y=120.83x-2.03$   | $R^2 = 0.9999$                         |
| Ferulic acid                                    | 40.5                 | 0.04                  | 330 nm            | -                                              | $y=194.39x-2.5029$ | $R^2 = 0.9999$                         |
| <b>Flavonols</b>                                |                      |                       |                   |                                                |                    |                                        |
| Quercetin 3-glucoside + Quercetin 3-glucuronide | 40.8                 | 0.04                  | 360 nm            | -                                              | $y=77.01x+2.209$   | $R^2 = 0.9990$                         |
| Myricetin                                       | 49.1                 | 0.03                  | 360 nm            | -                                              | $y=35.23x-0.253$   | $R^2 = 1.0000$                         |
| Quercetin                                       | 49.8                 | 0.01                  | 360 nm            | -                                              | $y=54.06x+8.963$   | $R^2 = 0.9999$                         |
| <b>Flavan-3-ols</b>                             |                      |                       |                   |                                                |                    |                                        |
| Procyanidin B1                                  | 24.3                 | 0.38                  | -                 | 280 nm; 320 nm                                 | $y=14.02x-4.015$   | $R^2 = 0.9999$                         |
| Procyanidin B3                                  | 25.0                 | 0.15                  | -                 | 280 nm; 320 nm                                 | $y=12.82x-4.646$   | $R^2 = 1.0000$                         |
| (+)-Catechin                                    | 26.7                 | 0.05                  | -                 | 280 nm; 320 nm                                 | $y=27.39x+2.201$   | $R^2 = 0.9999$                         |
| Procyanidin B2                                  | 29.6                 | 0.02                  | -                 | 280 nm; 320 nm                                 | $y=14.32x+3.960$   | $R^2 = 1.0000$                         |
| (-)-Epicatechin                                 | 31.1                 | 0.03                  | -                 | 280 nm; 320 nm                                 | $y=24.55x+3.960$   | $R^2 = 0.9998$                         |
| Procyanidin C1                                  | 32.5                 | 0.03                  | -                 | 280 nm; 320 nm                                 | $y=12.81x-2.102$   | $R^2 = 1.0000$                         |
| <b>Stilbenes</b>                                |                      |                       |                   |                                                |                    |                                        |
| <i>trans</i> -Piceid                            | 15.8                 | 0.24                  | 306 nm            | -                                              | $y=26.58x-2.905$   | $R^2 = 0.99997$                        |
| Piceatannol                                     | 17.0                 | 0.29                  | 306 nm            | -                                              | $y=34.39x-1.220$   | $R^2 = 0.99997$                        |
| Resveratrol                                     | 20.5                 | 0.12                  | 306 nm            | -                                              | $y=49.65x-1.15$    | $R^2 = 0.99999$                        |
| <i>cis</i> -Piceid                              | 20.9                 | 0.09                  | 306 nm            | -                                              | $y=49.65x-1.15$    | $R^2 = 0.99999$                        |
